# Supplementary material for: Partial Cone Loss Triggers Synapse-Specific Remodeling and Spatial Receptive Field Rearrangements in a Mature Retinal Circuit
Source: PubMed Central journal article supplement — Cell Rep. Author manuscript; Available in PMC 2019 Jul 11. (PMC6624172; doi:10.1016/j.celrep.2019.04.065), 2019-05-14
Supplement: NIHMS1529704-supplement-1.pdf [file NIHMS1529704-supplement-1.pdf]

**Cell Reports, Volume 27**

**Supplemental Information**

**Partial Cone Loss Triggers Synapse-Specific**

**Remodeling and Spatial Receptive Field**

**Rearrangements in a Mature Retinal Circuit**

**Rachel A. Care, David B. Kastner, Irina De la Huerta, Simon Pan, Atrey Khoche, Luca Della Santina, Clare Gamlin, Chad Santo Tomas, Jenita Ngo, Allen Chen, Yien-Ming Kuo, Yvonne Ou, and Felice A. Dunn**

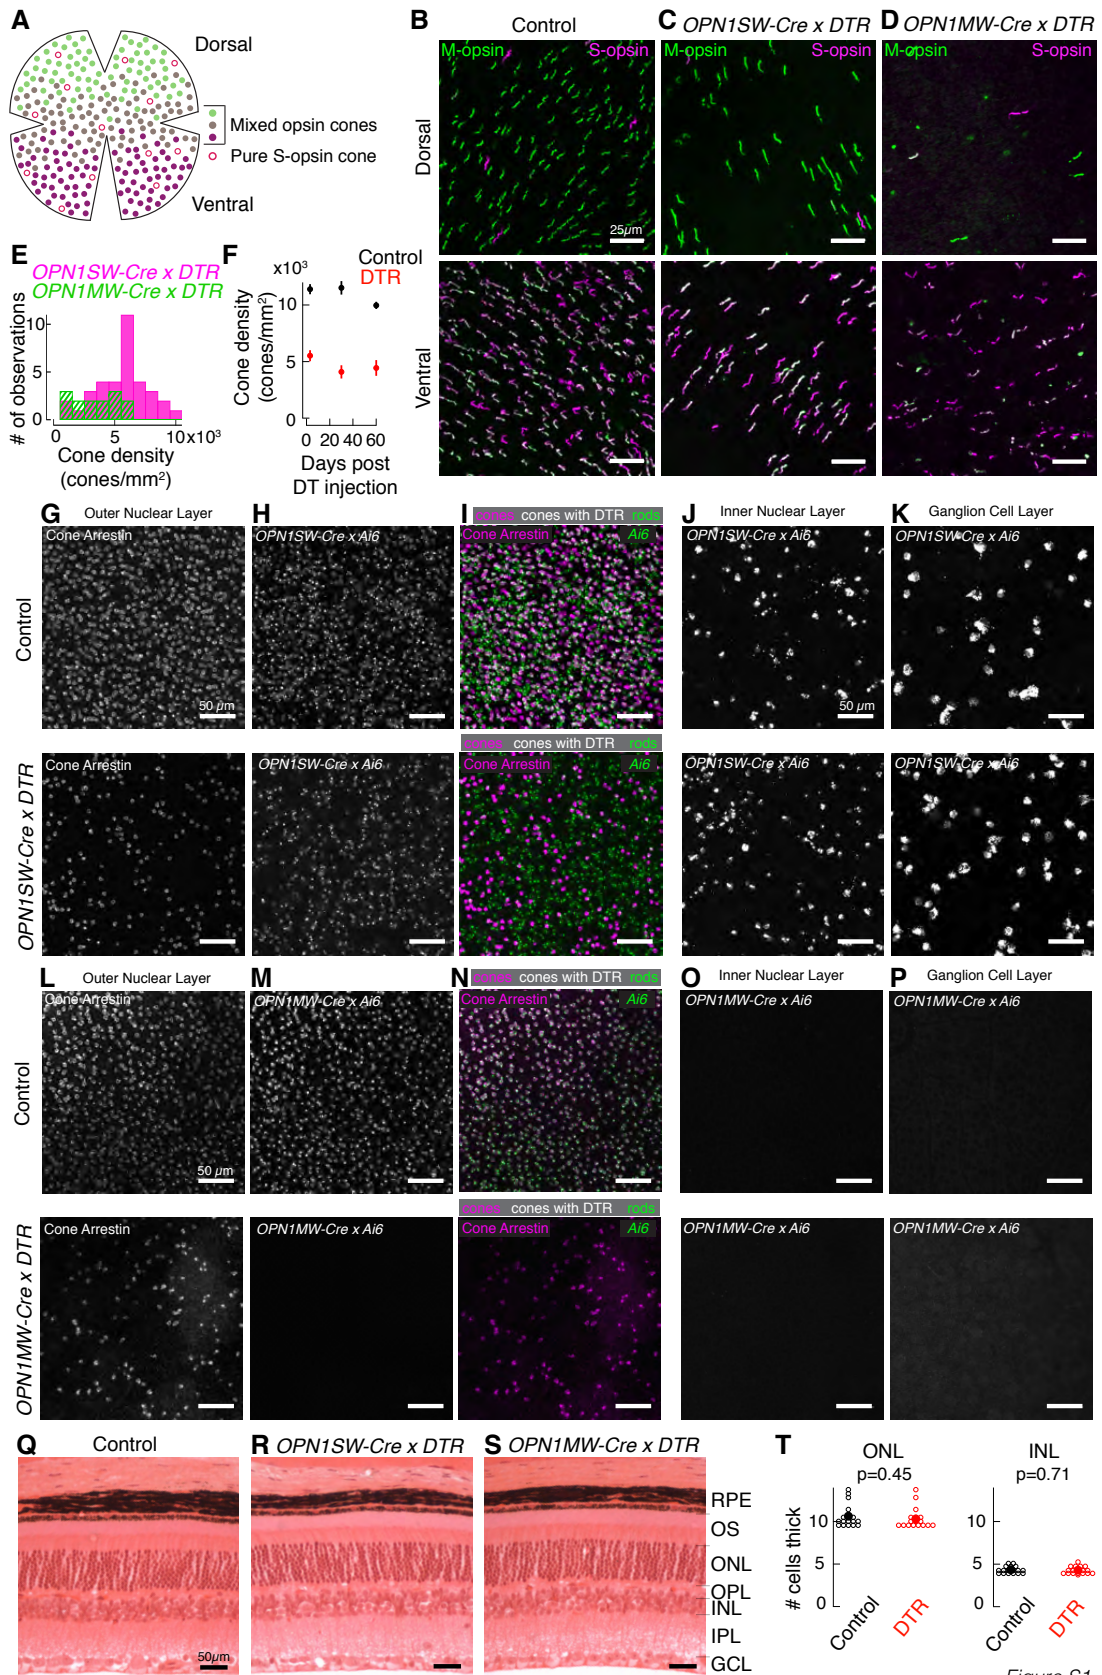

Figure S1

**Figure S1. Diphtheria toxin system does not significantly affect other retinal cell types. Related to Figure 1.**

(A) Schematic of the cone opsin distribution in mice in which middle wavelength (M) opsin is rich in dorsal retina (green), short wavelength (S) opsin is rich in ventral retina (magenta), and mixed opsin cones are found throughout retina.

(B-D) Confocal images of cone outer segments labeled in dorsal (top) and ventral (bottom) regions by the M opsin antibody (green) and S opsin antibody (magenta) in (B) control, (C) *OPN1SW-Cre x DTR*, and (D) *OPN1MW-Cre x DTR* retina. Both DTR lines spare cones with M and S opsin as shown by the persistence of cones containing M and S opsins.

(E) Histogram of cone density in *OPN1SW-Cre x DTR* (magenta) and *OPN1MW-Cre x DTR* (green) retina after DT injection. *OPN1SW* n = 35 retinas; *OPN1MW* n = 14 retinas.

(F) Cone density in control and DTR retina as a function of time since DT injection. One-way ANOVA was used to test for differences in cone density across intervals: Control  $F(2, 31)=2.57$ ,  $p=0.09$ ; DTR  $F(2, 31)=1.2$ ,  $p=0.32$ .

(G-K) Confocal images of cell somas in the indicated layer from the *OPN1SW-Cre x Ai6* mouse line. (G) Cone somas labeled by cone arrestin in the outer nuclear layer. (H) Cone and rod somas that express Ai6 fluorescence. (I) Overlay of cone arrestin (magenta) and Ai6 fluorescence (green). Cones labeled with cone arrestin and not expressing Ai6 are magenta, cones labeled with cone arrestin and expressing Ai6 are white, and rods expressing Ai6 are green. Cones expressing Ai6 (white) are numerous in control retina (top row) and diminish in DTR retina (bottom row) after DT administration, while photoreceptors not expressing Ai6 (cones = magenta; rods = green) are unaffected by DT administration.

(J,K) Maximum intensity projections of the (J) inner nuclear layer and (K) ganglion cell layer show that Ai6 fluorescence in bipolar and amacrine cells (J) and displaced amacrine cells and ganglion cells (K) does not decrease after DT administration, indicating that these cell populations survive our dosage of DT.

(L-P) Confocal images of cell somas in the indicated layer from the *OPN1MW-Cre x Ai6* mouse line. (L) Cone somas labeled by cone arrestin in the outer nuclear layer. Cones remain in DTR retina (bottom row). (M) Cone somas that express Ai6 fluorescence. (N) Overlay of cone arrestin (magenta) and Ai6 fluorescence (green). Most cones express Ai6 (white, top), and no rods express Ai6 (absence of green). Cones expressing Ai6 (white) are numerous in control retina (top row) and completely killed in DTR retina (bottom row).

(O,P) Maximum intensity projections of the (O) inner nuclear layer and (P) ganglion cell layer show no Ai6 fluorescence in bipolar and amacrine cells (O) nor in displaced amacrine cells and ganglion cells (P). Retinal location was determined by *Syt2* and *SMI-32* staining.

(Q-S) Plastic sections from (Q) control, (R) *OPN1SW x DTR*, (S) *OPN1MW-Cre x DTR* retina. Sections stained with Hematoxylin and Eosin. Layers of the retina are labeled on the right: RPE = retinal pigment epithelium, OS = outer segments, ONL = outer nuclear layer containing 97% rod cell bodies and 3% cone cell bodies (Jeon et al., 1998), OPL = outer plexiform layer, INL = inner nuclear layer containing bipolar cell and amacrine cell bodies, IPL = inner plexiform layer, and GCL = ganglion cell layer.

(T) Quantification of number of cell bodies in each column of the OPL and INL in retinal sections cut close to the optic nerve head. Quantification taken at multiple locations within and across retinal sections. No significant difference in the number of photoreceptor cell bodies in

ONL nor in the number of bipolar and amacrine cell bodies in the INL between control and DTR retinas (rank sum).



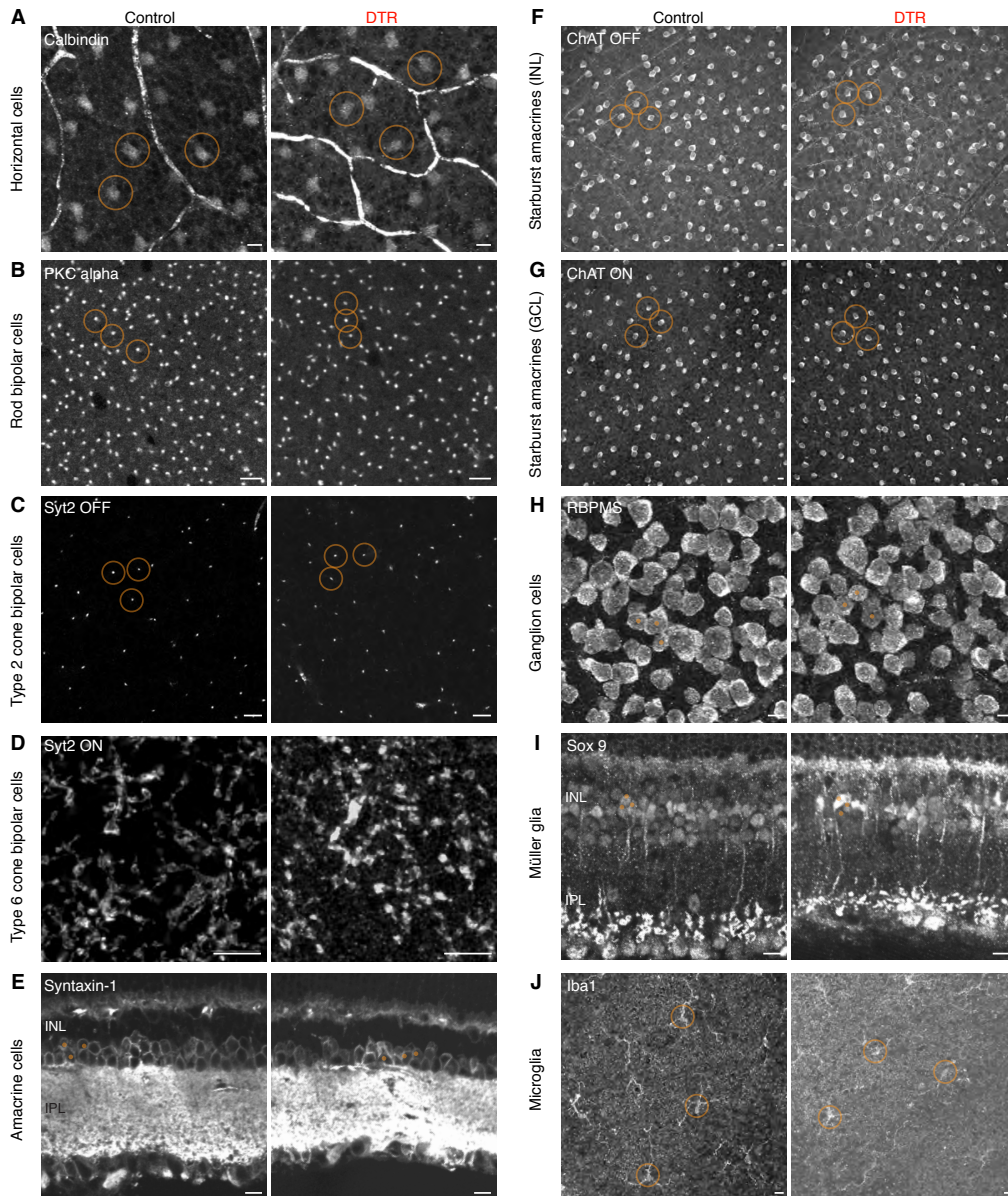

Figure S2

**Figure S2. Effects of the diphtheria toxin system on non-cone retinal cell types. Related to Figure 1.**

Example images of cell types under control and DTR conditions. When labeling was quantified, images show 3 examples of counts either by orange circles or dots. Quantification was done on areas larger than shown images (Table S1). (A) Horizontal cell somas labeled by calbindin in flat mount. (B) Rod bipolar cell axons stalks labeled by PKC alpha in flat mount. (C) Type 2 OFF cone bipolar cell axon stalks labeled by Syt2 in flat mount. (D) Type 6 ON cone bipolar cell axons labeled by Syt2 in flat mount. Syt2 labeling was variable between retinas and did not label the axon stalk and hence was not quantified. (E) Amacrine cell somas labeled by syntaxin-1 in sections. (F) Starburst amacrine cell somas in the inner nuclear layer (INL) labeled

by ChAT in flat mount. (G) Starburst amacrine cell somas in the ganglion cell layer (GCL) labeled by ChAT in flat mount. (H) Ganglion cell somas labeled by RBPMS in flat mount. (I) Müller glia labeled by Sox 9 in the section. (J) Microglia labeled by Iba1 at the level of the outer plexiform layer in flat mount. All scale bars = 10 $\mu$ m.

| Cell Type                      | Methods: antibody, retinal layer imaged, flat mount or section, retinal topography if specific | Control Density (median±IQR)       | DTR Density (median ±IQR)           | n = images for control (& DTR)<br>N = mice for control (& DTR) | Rank sum test p-value |
|--------------------------------|------------------------------------------------------------------------------------------------|------------------------------------|-------------------------------------|----------------------------------------------------------------|-----------------------|
| Horizontal cells               | Calbindin, ONL, flat mount, dorsal-nasal                                                       | 1011.7±372.7 cells/mm <sup>2</sup> | 842.0±83.2 cells/mm <sup>2</sup>    | n = 6 (4)<br>N = 3 (2)                                         | p = 0.17              |
| Rod bipolar cells              | PKCalpha, IPL, flat mount, dorsal-nasal                                                        | 16474±2127 cells/mm <sup>2</sup>   | 15146±945 cells/mm <sup>2</sup>     | n = 8 (6)<br>N = 3 (3)                                         | p = 0.23              |
| Type 2 OFF cone bipolar cells  | Syt2, IPL, flat mount, dorsal-nasal                                                            | 2983.6±189.8 cells/mm <sup>2</sup> | 2630.6±279.7 cells/mm <sup>2</sup>  | n = 4 (6)<br>N = 2 (3)                                         | p = 0.019             |
| Amacrine cells                 | Syntaxin-1, INL, sections                                                                      | 280.0±59.8 cells/mm                | 278.8±54.0 cells/mm                 | n = 4 (4)<br>N = 2 (2)                                         | p = 0.69              |
| Starburst amacrine cells (OFF) | ChAT, INL, flat mount, dorsal-nasal                                                            | 1202.1±163.2 cells/mm <sup>2</sup> | 1168.8±326.3 cells/mm <sup>2</sup>  | n = 4 (6)<br>N = 2 (3)                                         | p = 0.50              |
| Starburst amacrine cells (ON)  | ChAT, GCL, flat mount, dorsal-nasal                                                            | 1142.1±183.1 cells/mm <sup>2</sup> | 1092.2±166.5 cells/mm <sup>2</sup>  | n = 4 (6)<br>N = 2 (3)                                         | p = 0.50              |
| Ganglion cells                 | RBPMS, GCL, flat mount, dorsal-nasal                                                           | 3346.5±978.0 cells/mm <sup>2</sup> | 2967.3±1403.8 cells/mm <sup>2</sup> | n = 7 (6)<br>N = 3 (3)                                         | p = 0.73              |
| Müller glia                    | Sox9, INL, sections                                                                            | 414.2±62.7 cells/mm                | 246.5±164.0 cells/mm                | n = 4 (4)<br>N = 2 (2)                                         | p = 0.06              |
| Microglia                      | Iba1, OPL, flat mount, dorsal-nasal                                                            | 103.2±23.2 cells/mm <sup>2</sup>   | 109.9±10.0 cells/mm <sup>2</sup>    | n = 4 (4)<br>N = 2 (2)                                         | p = 0.83              |

**Table S1. Effects of the diphtheria toxin system on the densities of non-cone retinal celltypes. Related to Figure 1.**

Quantification of major cell types in the retina under control and DTR conditions. Number of cell bodies was either quantified in flat mount (area density) or sections (linear density). Only the type 2 OFF cone bipolar cells show a significant decrease in density. Retinal layers: OPL = outer plexiform layer, ONL = outer nuclear layer, INL = inner nuclear layer, IPL = inner plexiform layer, and GCL = ganglion cell layer.

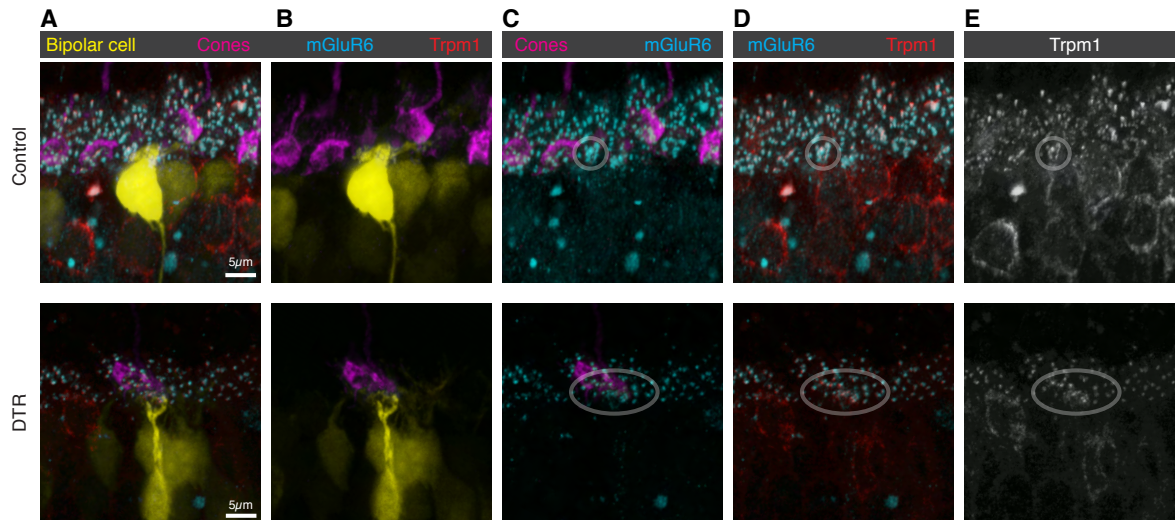

Figure S3

**Figure S3. Transduction channel Trpm1 colocalizes with mGluR6. Related to Figure 3.**

(A) Sections of (top) control and (bottom) DTR retina. Confocal images of a type 6 cone bipolar cell labeled by *Grm6-TdTomato* (yellow), cones labeled by cone arrestin (magenta), glutamate receptor labeled by mGluR6 (cyan), and transduction channel labeled by Trpm1 (red).

(B) Bipolar cell dendrites contacting nearby cones. In the DTR retina, only a single cone remains in the vicinity.

(C) mGluR6 is clustered at the pedicles of cones (ovals), whereas rod-associated mGluR6 is punctate.

(D) mGluR6 and Trpm1 colocalize both at the cone-associated clusters (ovals) and at the rod-associated puncta. (Bottom) In the absence of other cones, we find no evidence for clusters of cone-associated mGluR6 or Trpm1 by itself, suggesting that both proteins are either present or absent.

(E) Trpm1 colocalizes at cone-associated clusters, rod-associated puncta, and around the somas of ON bipolar cells.

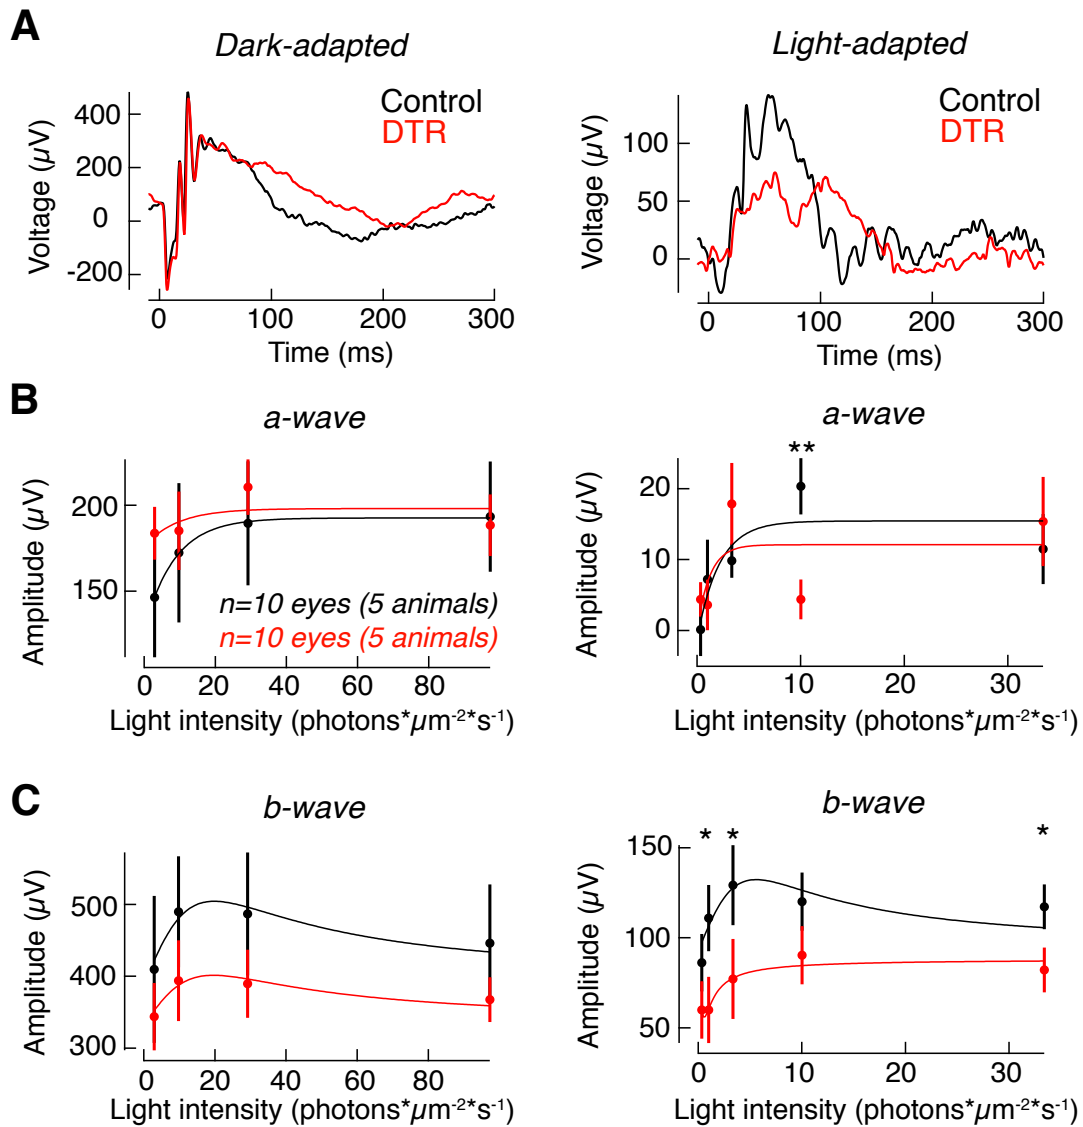

Figure S4

**Figure S4. The photopic, but not scotopic, electroretinogram response is decreased after partial cone ablation. Related to Figure 4.**

(A) Example traces of ERGs from control (black) and DTR (red) mice show an intact response at scotopic light levels (left) and a diminished response at photopic light levels (right). Traces shown are averages of recordings from the right and left eyes, which were made simultaneously.

(B) Absolute value of the a-wave amplitude, a measure of photoreceptor activity, across a range of light levels is maintained at scotopic light levels (left) but reduced in photopic light levels (right). Data fit with a single exponential function. (In light-adapted condition at 10.02

photons\* $\mu\text{m}^{-2}\text{s}^{-1}$ : Control:  $20.36\pm 4.0\mu\text{V}$ , n=10 eyes from 5 animals; DTR:  $4.39\pm 2.8\mu\text{V}$ , n=10 eyes from 5 animals; mean $\pm$ sem; p=0.0077, t-test).

(C) Amplitude of the b-wave, a measure of ON bipolar cell activity, across a range of light levels is maintained at scotopic light levels (left) but reduced in photopic light levels (right). Data fit with a serpentine function. (In light-adapted condition: at 1.00 photons\* $\mu\text{m}^{-2}\text{s}^{-1}$ : Control:  $110.94\pm 18.4\mu\text{V}$ ; DTR:  $59.98\pm 11.1\mu\text{V}$ ; p=0.0332; at 3.34 photons\* $\mu\text{m}^{-2}\text{s}^{-1}$ : Control:  $129.19\pm 22.3\mu\text{V}$ ; DTR:  $77.14\pm 6.9\mu\text{V}$ ; p=0.0387; at 33.4 photons/ $\mu\text{m}^2\text{s}^{-1}$ : Control:  $117.27\pm 12.43\mu\text{V}$ ; DTR:  $82.19\pm 9.5\mu\text{V}$ ; p=0.0431; n=10 eyes from 5 animals; mean $\pm$ sem; t-test).

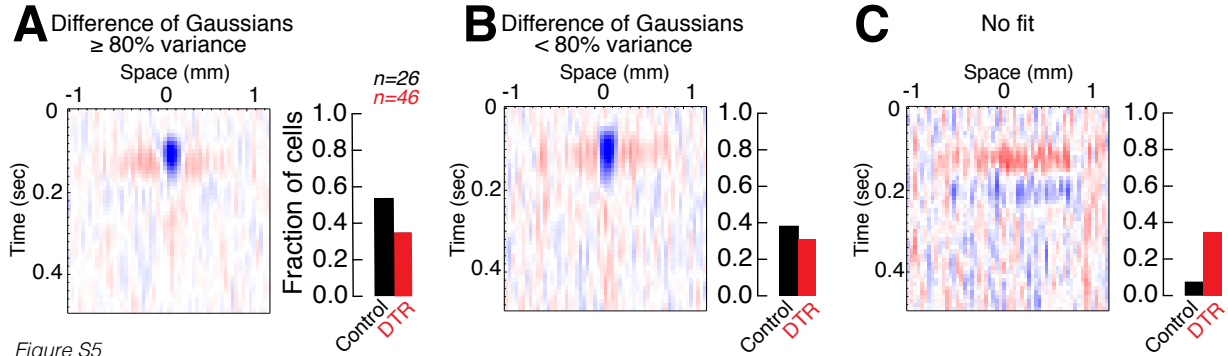

**Figure S5. A<sub>ON-S</sub> ganglion cell from DTR retina exhibit a range of receptive field structures. Related to Figure 5.**

(A) Spatio-temporal receptive field for a cell from DTR retina which was fit by a difference of Gaussians and for which  $\geq 80\%$  of the response variance in time was described by the first principal component. Bar graph (right) indicates that 53.8% of control and 34.8% of DTR cells fell into this category. Total number of ganglion cells in control and DTR retina indicated by n.

(B) Spatio-temporal receptive field for a cell from DTR retina which was fit by a difference of Gaussians and for which  $< 80\%$  of the response variance in time was described by the first principal component. Bar graph (right) indicates that 38.5% of control and 30.4% of DTR cells fell into this category.

(C) Spatio-temporal receptive field for a cell from DTR retina which was not fit by a difference of Gaussians. Bar graph (right) indicates that 7.7% of control and 34.8% of DTR cells fell into this category. These cells were not included in the receptive field analysis in Figure 5.
